# Supplementary material
Source: Springer Nature journal article supplement (https://www.springermedizin.de/resource/supplementary/13075_2012_3855_MOESM1_ESM.pdf/9695482)

1a

ethN

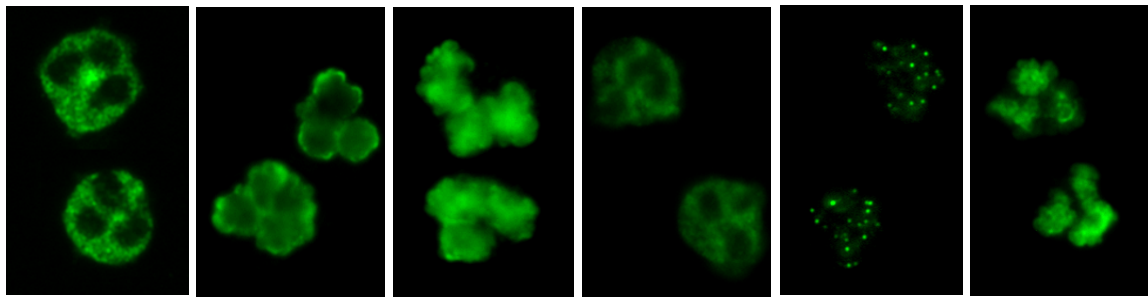

cytoplasmic

perinuclear

nuclear

atypical

atypical

atypical

10  $\mu$ m

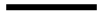

formN

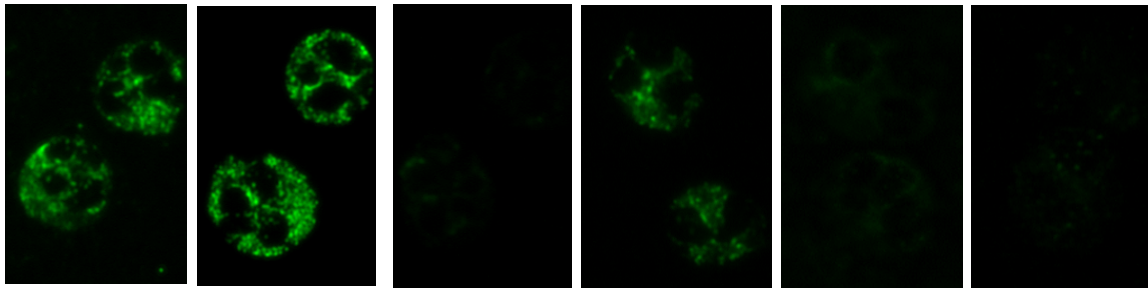

cytoplasmic

cytoplasmic

negative

cytoplasmic

negative

negative

1b

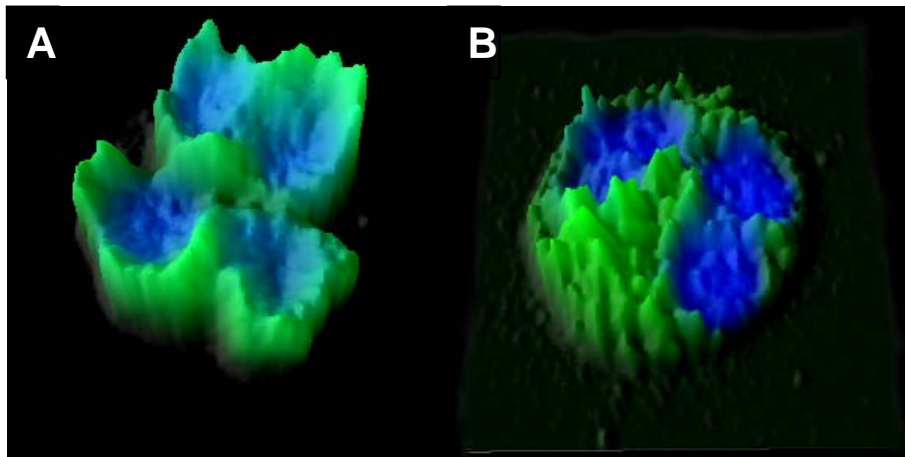

Supplement: MOESM1 [file 9695482]
